# Supplementary material for: Interactions of sulfur-containing acridine ligands with DNA by ESI-MS
Source: Royal Society of Chemistry journal article supplement (doi:10.1039/b905071j), 2009-01-01
Supplement: b905071j.pdf [file b905071j.pdf]

## Interactions of Sulfur-Containing Acridine Ligands with DNA by ESI-MS

Suncerae Smith<sup>1</sup>, Frank S. Guziec, Jr.<sup>2</sup>, Lynn Guziec<sup>2</sup>, Jennifer S. Brodbelt<sup>1</sup>

<sup>1</sup>Department of Chemistry and Biochemistry  
University of Texas at Austin  
Austin, TX 78712

<sup>2</sup>Department of Chemistry  
Southwestern University  
Georgetown, TX 79626

Correspondence to: Jennifer S. Brodbelt, [jbrodbelt@mail.utexas.edu](mailto:jbrodbelt@mail.utexas.edu)

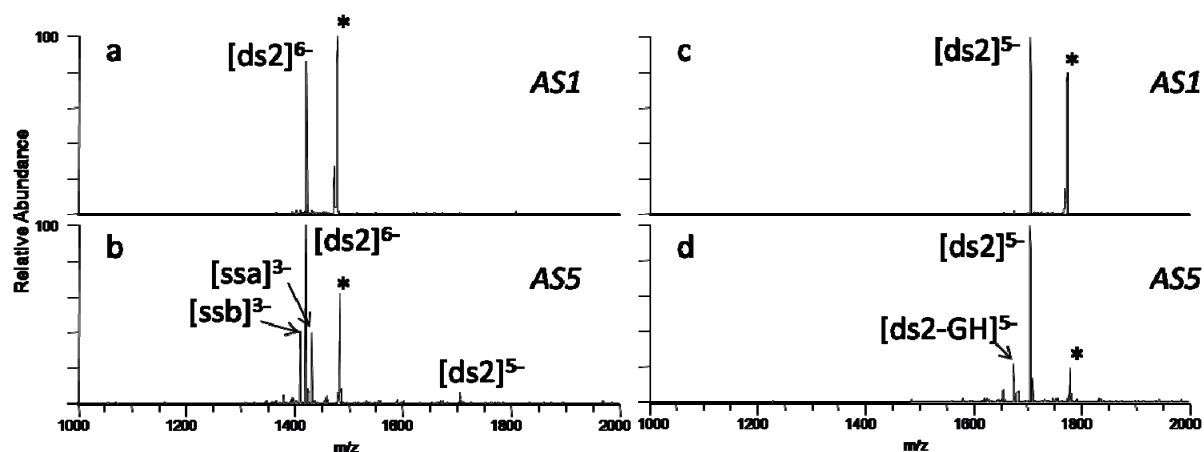

**Supplemental Figure 1.** IRMPD mass spectra of (a) [ds2 + AS1]<sup>6-</sup> with an irradiation time of 0.75 ms, (b) [ds2 + AS5]<sup>6-</sup> with an irradiation time of 1.0 ms, (c) [ds2 + AS1]<sup>5-</sup> with an irradiation time of 0.75 ms, and (d) [ds2 + AS5]<sup>5-</sup> with an irradiation time of 1.0 ms. The parent ion is denoted with an asterisk.

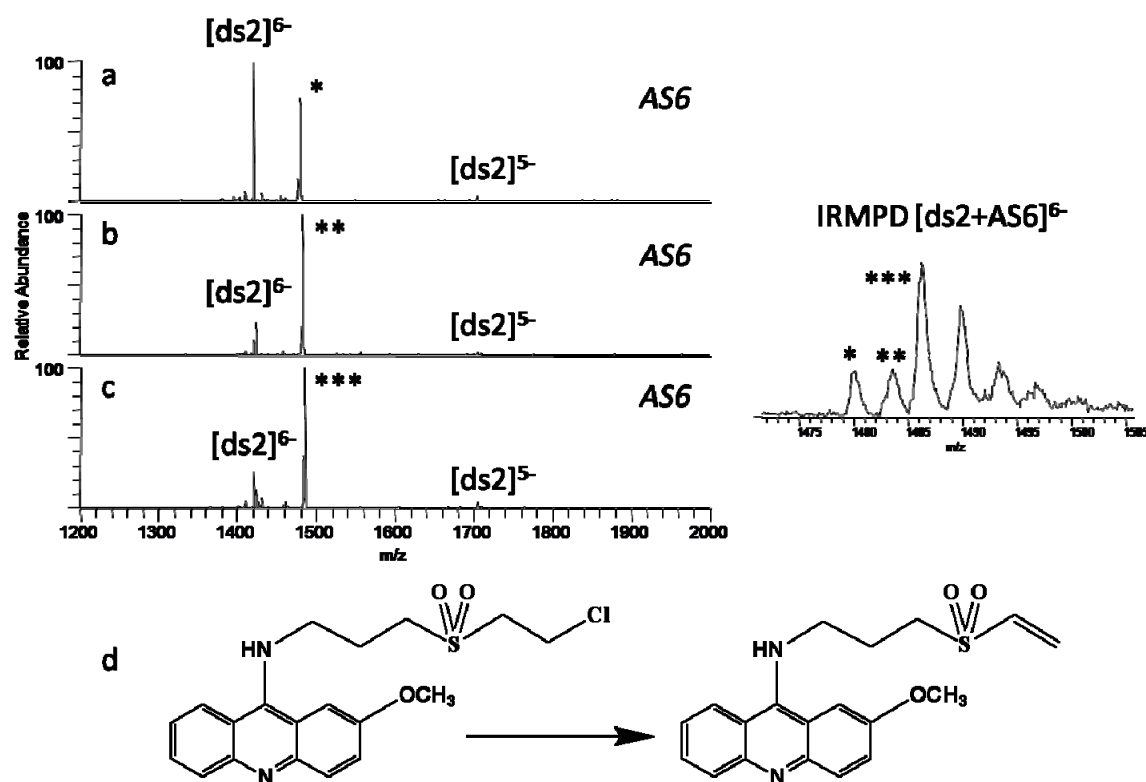

**Supplemental Figure 2.** (a-c) IRMPD mass spectra of  $[\text{ds}2 + \text{AS}6]^{6-}$  with an irradiation time of 0.75 ms. Each precursor ion, shown on the right with one, two, or three asterisks, was isolated and subjected to IRMPD. (d) Proposed pathway for formation of the lowest mass adduct.

**Supplemental Table 1.** Change in melting temperature of duplex 3 upon addition of acridine ligands

| Ligand | $\Delta T_m$ (°C) |
|--------|-------------------|
| AS1    | 6.2               |
| AS2    | 6.0               |
| AS3    | 6.6               |
| AS4    | 7.0               |
| AS5    | 7.9               |
| AS6    | 7.2               |
| AN1    | 6.4               |
